# Supplementary material for: Cross-sectional equity analysis of accessibility by automobile to tertiary care emergency services in Cali, Colombia in 2020
Source: bioRxiv or medRxiv preprint supplement (doi:10.1101/2022.02.03.22269929), 2022-02-04
Supplement: Supplementary file [file media-1.pdf]

## Cross-sectional equity analysis of accessibility by automobile to tertiary care emergency services in Cali, Colombia in 2020

STROBE Statement—Checklist of items that should be included in reports of *cross-sectional studies*

|                              | Item No | Recommendation                                                                                                                                                                                       | Page No |
|------------------------------|---------|------------------------------------------------------------------------------------------------------------------------------------------------------------------------------------------------------|---------|
| <b>Title and abstract</b>    | 1       | (a) Indicate the study's design with a commonly used term in the title or the abstract                                                                                                               | 1       |
|                              |         | (b) Provide in the abstract an informative and balanced summary of what was done and what was found                                                                                                  | 1       |
| <b>Introduction</b>          |         |                                                                                                                                                                                                      |         |
| Background/rationale         | 2       | Explain the scientific background and rationale for the investigation being reported                                                                                                                 | 2       |
| Objectives                   | 3       | State specific objectives, including any prespecified hypotheses                                                                                                                                     | 3       |
| <b>Methods</b>               |         |                                                                                                                                                                                                      |         |
| Study design                 | 4       | Present key elements of study design early in the paper                                                                                                                                              | 4       |
| Setting                      | 5       | Describe the setting, locations, and relevant dates, including periods of recruitment, exposure, follow-up, and data collection                                                                      | 4       |
| Participants                 | 6       | (a) Give the eligibility criteria, and the sources and methods of selection of participants                                                                                                          | 4       |
| Variables                    | 7       | Clearly define all outcomes, exposures, predictors, potential confounders, and effect modifiers. Give diagnostic criteria, if applicable                                                             | 8       |
| Data sources/<br>measurement | 8*      | For each variable of interest, give sources of data and details of methods of assessment (measurement). Describe comparability of assessment methods if there is more than one group                 | 5, 8-10 |
| Bias                         | 9       | Describe any efforts to address potential sources of bias                                                                                                                                            | 10      |
| Study size                   | 10      | Explain how the study size was arrived at                                                                                                                                                            | 12      |
| Quantitative variables       | 11      | Explain how quantitative variables were handled in the analyses. If applicable, describe which groupings were chosen and why                                                                         | 9 - 15  |
| Statistical methods          | 12      | (a) Describe all statistical methods, including those used to control for confounding                                                                                                                | 9, 15   |
|                              |         | (b) Describe any methods used to examine subgroups and interactions                                                                                                                                  | 9, 15   |
|                              |         | (c) Explain how missing data were addressed                                                                                                                                                          | 15      |
|                              |         | (d) If applicable, describe analytical methods taking account of sampling strategy                                                                                                                   |         |
|                              |         | (e) Describe any sensitivity analyses                                                                                                                                                                |         |
| <b>Results</b>               |         |                                                                                                                                                                                                      |         |
| Participants                 | 13*     | (a) Report numbers of individuals at each stage of study—e.g., numbers potentially eligible, examined for eligibility, confirmed eligible, included in the study, completing follow-up, and analyzed | 15      |
|                              |         | (b) Give reasons for non-participation at each stage                                                                                                                                                 | N.A.    |
|                              |         | (c) Consider use of a flow diagram                                                                                                                                                                   |         |
| Descriptive data             | 14*     | (a) Give characteristics of study participants (e.g., demographic, clinical, social) and information on exposures and potential confounders                                                          | 15      |
|                              |         | (b) Indicate number of participants with missing data for each variable of interest                                                                                                                  | 15      |
| Outcome data                 | 15*     | Report numbers of outcome events or summary measures                                                                                                                                                 | 15      |

**Cross-sectional equity analysis of accessibility by automobile to tertiary care emergency services in Cali, Colombia in 2020**

|                          |    |                                                                                                                                                                                                                |      |
|--------------------------|----|----------------------------------------------------------------------------------------------------------------------------------------------------------------------------------------------------------------|------|
| Main results             | 16 | (a) Give unadjusted estimates and, if applicable, confounder-adjusted estimates and their precision (e.g., 95% confidence interval). Make clear which confounders were adjusted for and why they were included | 15   |
|                          |    | (b) Report category boundaries when continuous variables were categorized                                                                                                                                      | 8-15 |
|                          |    | (c) If relevant, consider translating estimates of relative risk into absolute risk for a meaningful time period                                                                                               |      |
| Other analyses           | 17 | Report other analyses done—e.g., analyses of subgroups and interactions, and sensitivity analyses                                                                                                              | 14   |
| <b>Discussion</b>        |    |                                                                                                                                                                                                                |      |
| Key results              | 18 | Summarize key results with reference to study objectives                                                                                                                                                       | 16   |
| Limitations              | 19 | Discuss limitations of the study, taking into account sources of potential bias or imprecision. Discuss both direction and magnitude of any potential bias                                                     | 17   |
| Interpretation           | 20 | Give a cautious overall interpretation of results considering objectives, limitations, multiplicity of analyses, results from similar studies, and other relevant evidence                                     | 18   |
| Generalizability         | 21 | Discuss the generalizability (external validity) of the study results                                                                                                                                          | 19   |
| <b>Other information</b> |    |                                                                                                                                                                                                                |      |
| Funding                  | 22 | Give the source of funding and the role of the funders for the present study and, if applicable, for the original study on which the present article is based                                                  | 19   |

\*Give information separately for exposed and unexposed groups.
